# Supplementary material
Source: Springer Nature journal article supplement (https://www.springermedizin.de/resource/supplementary/12913_2013_2936_MOESM3_ESM.pdf/9531960)
Supplement: MOESM3 [file 9531960]

## 2: Beta blockers, take the next step for heart failure-Rate of use of beta blockers by those with heart failure

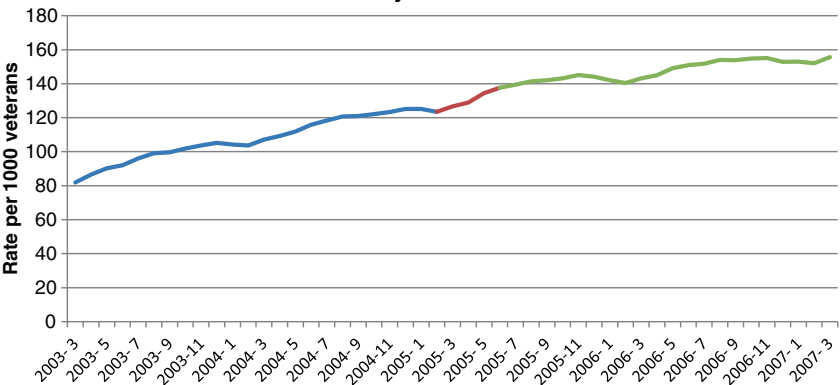

— Pre-intervention period: Mar 2003- Feb 2005. Monthly change: 1.017 (1.015-1.019)  $p < 0.0001$ . This means that the number of veterans with CHF using a beta blocker was increasing by 1.7% per month pre-intervention.

— Intervention period: Mar 2005 – Jun 2005. Change in use: 1.07 (1.04-1.10)  $p < 0.0001$ . This means that the number of veterans with CHF using beta blockers increased by 7% at the time of the intervention.

— Postintervention period: Jul 2005 – Mar 2007. Monthly change (relative to pre-intervention): 0.989 (0.986-0.991)  $p < 0.0001$ .

This means that the number of veterans with CHF using beta blockers was decreasing by 1.1% per month compared to the pre-intervention trend i.e. overall, post-intervention the number of veterans with CHF dispensed beta blockers increased by 0.6% each month

Overall effect: 642 additional veterans with CHF were dispensed beta blockers as a result of the intervention
